# Supplementary material for: Enhanced ion diffusion induced by structural transition of Li-modified borophosphene
Source: Royal Society of Chemistry journal article supplement (doi:10.1039/d0cp03247f), 2020-01-01
Supplement: d0cp03247f1.pdf [file d0cp03247f1.pdf]

Supplementary Material for

## **Enhanced Ions Diffusion Induced by Structural Transition for Li-Modified Borophosphene**

*Shiping Wang<sup>1,§</sup>, Wei Zhang<sup>1,2,§</sup>, Cai Lu<sup>1</sup>, Yanhuai Ding<sup>1</sup>, Jiuren Yin<sup>1</sup>, Ping Zhang<sup>1</sup> and Yong Jiang<sup>1,\*</sup>*

*<sup>1</sup>College of Civil Engineering & Mechanics, Xiangtan University, Hunan 411105, China*

*<sup>2</sup>College of electrical engineering, Zhejiang University of Water Resources and Electric Power,  
Zhejiang 310018, China*

*<sup>§</sup>Shiping Wang and Wei Zhang contributed equally to this work.*

*E-mail: jiangy@xtu.edu.cn*

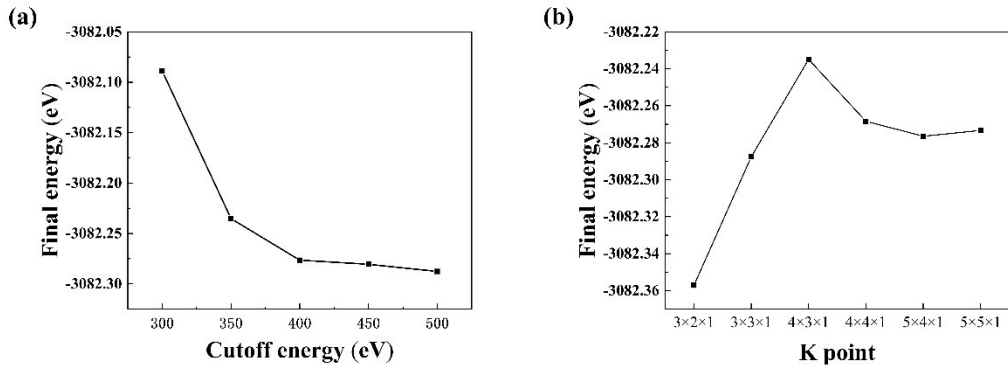

**Figure S1.** (a) The total energy of  $B_{12}P_{12}$  at different cutoff energy when Monkhorst-Pack K-point mesh is set as  $5 \times 4 \times 1$ . (b) The total energy of  $B_{12}P_{12}$  at different Monkhorst-Pack K-point mesh.

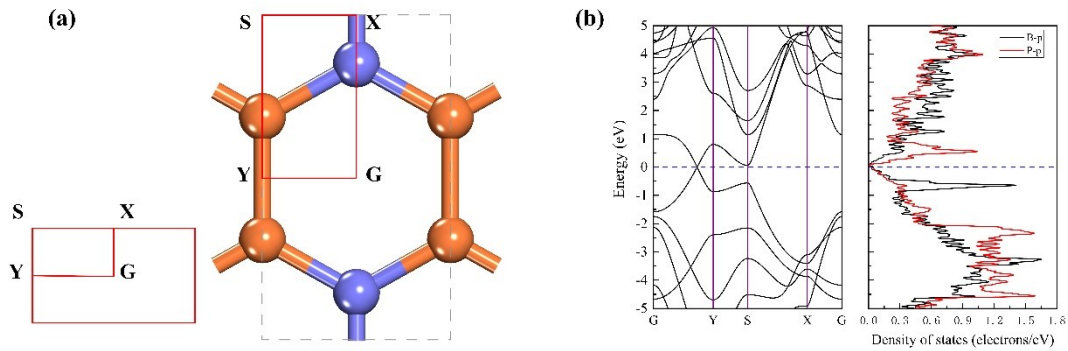

**Figure S2.** (a) the integration path in the Brillouin zone for the unit cell of monolayer borophosphene. (b) The band structure and partial density of states of monolayer borophosphene.

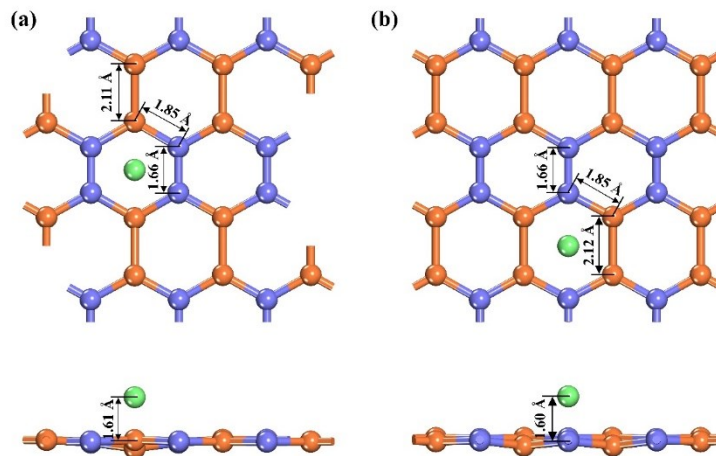

**Figure S3.** The structural information for Li adsorption in  $B_{12}P_{12}$  at binding sites of (a)  $B_4P_2$ -ring and (b)  $B_2P_4$ -ring centers, respectively.

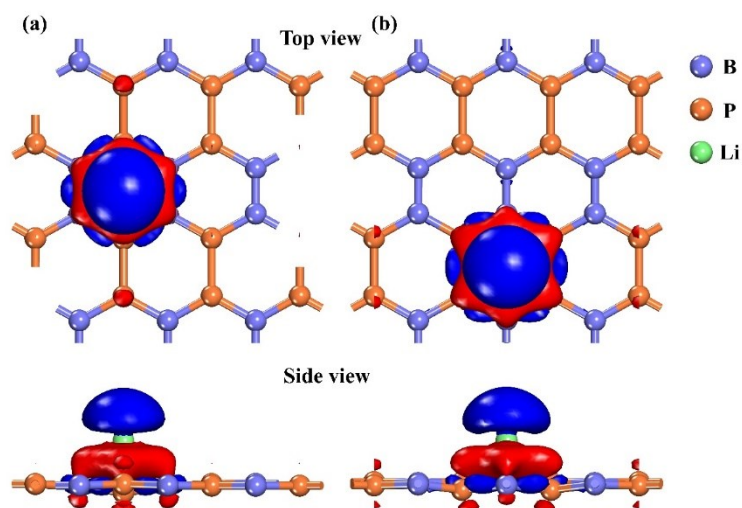

**Figure S4.** The differential charge density distribution of  $\text{LiB}_{12}\text{P}_{12}$  at (a)  $\alpha$  site and (b)  $\beta$  site, with red and blue areas illustrating charge sufficient and charge deficient regions respectively at isosurface of  $0.01 \text{ e}/\text{\AA}^3$ . The green ball represents lithium atom.

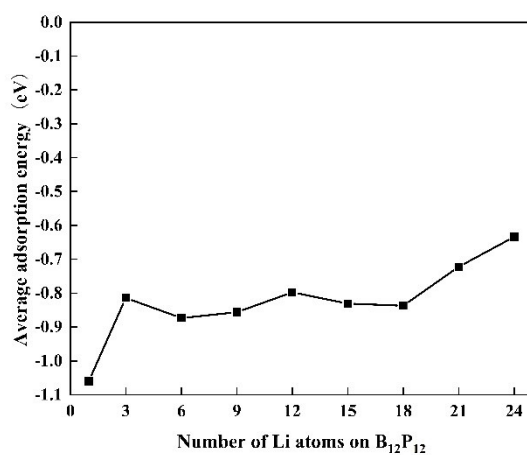

**Figure S5.** The average adsorption energy of  $\text{Li}_x\text{B}_{12}\text{P}_{12}$  at Li concentration  $x$  of 1, 3, 6, 9, ... , and 24, respectively.

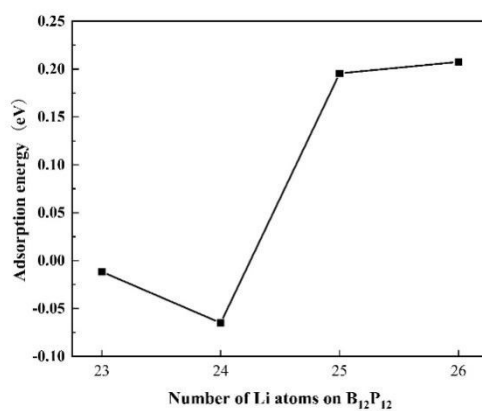

**Figure S6.** Adsorption energy of the  $x$ -th Li atom in  $\text{Li}_x\text{B}_{12}\text{P}_{12}$  ( $x = 23, 24, 25, 26$ ).

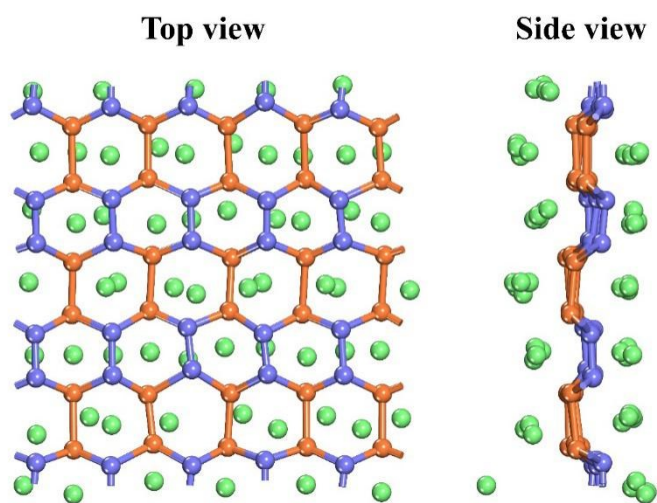

**Figure S7.** Top and side views of AIMD simulations for  $\text{Li}_{60}\text{B}_{30}\text{P}_{30}$  supercell at 500K after 5 ps.
